# Supplementary material for: GSK-3β Overexpression Alters the Dendritic Spines of Developmentally Generated Granule Neurons in the Mouse Hippocampal Dentate Gyrus
Source: PubMed Central journal article supplement (PMC5344922; doi:10.3389/fnana.2017.00018), 2017-03-10

**A**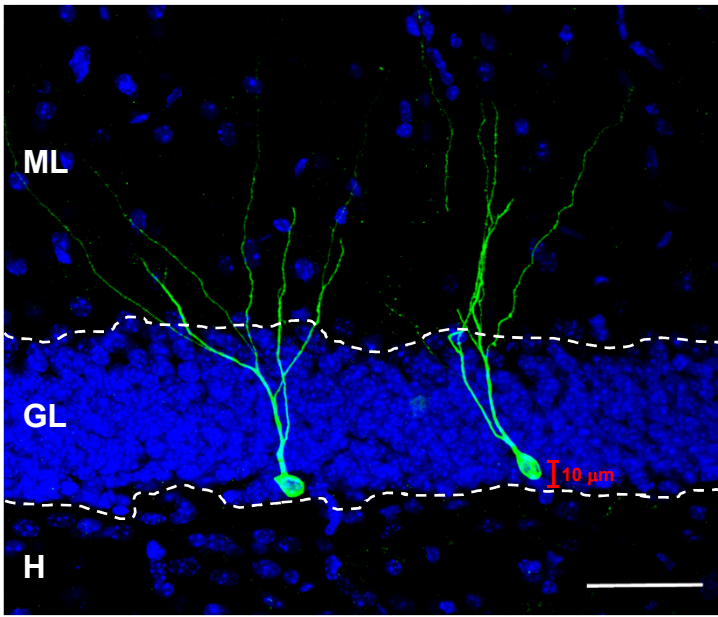**B**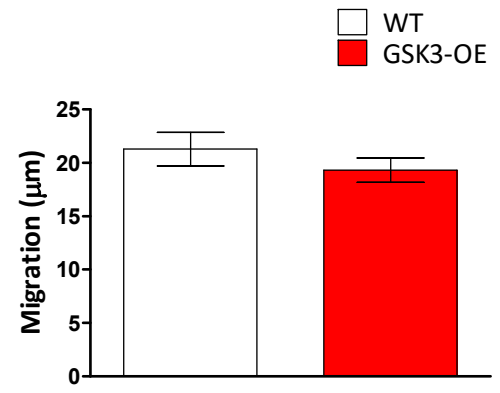

Supplement: Image_1.pdf [file Image_1.pdf]
